# Supplementary material
Source: Copernicus journal article supplement (doi:10.5194/bg-23-4529-2026)
Supplement: Supplementary file 1 [file bg-23-4529-2026-supplement.pdf]

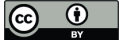

*Supplement of*

## **Modelling root exudation and plant-microbe interactions under CO<sub>2</sub> fertilization in a mature forest**

**Kristian Schufft et al.**

*Correspondence to:* Kristian Schufft ([kschufft@bgc-jena.mpg.de](mailto:kschufft@bgc-jena.mpg.de))

The copyright of individual parts of the supplement might differ from the article licence.

## **Supplement**

This supplement contains tables for data displayed in figures

Table S1: Comparison of the fate of additional sequestered C (Figure 4)

|                  | <b>flux_class</b> | <b>flux</b>    | <b>Percentage of additional GPP</b> |
|------------------|-------------------|----------------|-------------------------------------|
| <b>simulated</b> |                   |                |                                     |
|                  | Ra+BP+CEX         | BP             | 32.6                                |
|                  | Ra+BP+CEX         | Ra             | 37.0                                |
|                  | Ra+BP+CEX         | CEX            | 30.3                                |
|                  | R                 | Rh             | 27.8                                |
|                  | R                 | Ra             | 37.0                                |
|                  | DCpools           | dVeg           | 19.5                                |
|                  | DCpools           | dSOC_deep_soil | 7.11                                |
|                  | DCpools           | dSOC_top_soil  | 2.96                                |
|                  | DCpools           | dlitter        | 5.57                                |
| <b>observed</b>  |                   |                |                                     |
|                  | Ra+BP+CEX         | BP             | 8.97                                |
|                  | Ra+BP+CEX         | Ra             | 31.0                                |
|                  | Ra+BP+CEX         | CEX            | 60.1                                |
|                  | R                 | Ra             | 31.0                                |
|                  | R                 | Rh             | 55.8                                |
|                  | DCpools           | dVeg           | -0.196                              |
|                  | DCpools           | dSOC_top_soil  | -12.4                               |
|                  | DCpools           | dlitter        | 14.1                                |

**Table S2: simulated CO<sub>2</sub> effect on sources and sinks for C in soils at EucFACE (Figure 5)**

| <b>flux</b>      | <b>values (gC m<sup>-2</sup><br/>yr<sup>-1</sup>)</b> | <b>claa</b>                  | <b>Panel</b>        |
|------------------|-------------------------------------------------------|------------------------------|---------------------|
| l_fall           | 35.8880639                                            | soil C input                 | ambient~fluxes      |
| CEX              | 30.4848970                                            | soil C input                 | ambient~fluxes      |
| Rh_res           | 13.1355138                                            | Heterotrophic<br>respiration | ambient~fluxes      |
| Rh_CEX           | 14.9554148                                            | Heterotrophic<br>respiration | ambient~fluxes      |
| Rh_other         | 32.7647865                                            | Heterotrophic<br>respiration | ambient~fluxes      |
| growth_deep_soil | 3.3953828                                             | microbial growth             | ambient~fluxes      |
| growth_top_soil  | 31.1427913                                            | microbial growth             | ambient~fluxes      |
| growth_deep_soil | 2.3634779                                             | necromass growth             | ambient~fluxes      |
| growth_top_soil  | 21.6206735                                            | necromass growth             | ambient~fluxes      |
| l_fall           | 3.9742372                                             | soil C input                 | CO[2]~effect~fluxes |
| CEX              | 9.1672716                                             | soil C input                 | CO[2]~effect~fluxes |
| Rh_res           | 1.2881477                                             | Heterotrophic<br>respiration | CO[2]~effect~fluxes |
| Rh_CEX           | 4.5165578                                             | Heterotrophic<br>respiration | CO[2]~effect~fluxes |
| Rh_other         | 2.6053544                                             | Heterotrophic<br>respiration | CO[2]~effect~fluxes |
| growth_deep_soil | 0.4473033                                             | microbial growth             | CO[2]~effect~fluxes |
| growth_top_soil  | 4.4116995                                             | microbial growth             | CO[2]~effect~fluxes |
| growth_deep_soil | 0.2976769                                             | necromass growth             | CO[2]~effect~fluxes |

20 **Table S3: Simulated annual main fluxes for microbial, enzyme-mediated nutrient acquisition from organic matter for topsoil in (Figure 6 a)**

| Year | flux_residue_2_dom_n | treatment |
|------|----------------------|-----------|
| 2013 | 40.32832             | ambient   |
| 2014 | 40.06573             | ambient   |
| 2015 | 43.05059             | ambient   |
| 2016 | 41.81066             | ambient   |
| 2017 | 40.32595             | ambient   |
| 2018 | 42.61828             | ambient   |
| 2019 | 43.03240             | ambient   |
| 2013 | 42.01665             | elevated  |
| 2014 | 43.29253             | elevated  |
| 2015 | 46.53790             | elevated  |
| 2016 | 46.09445             | elevated  |
| 2017 | 44.66263             | elevated  |
| 2018 | 47.41825             | elevated  |
| 2019 | 47.51070             | elevated  |

25 **Table S4: Simulated annual main fluxes for microbial, enzyme-mediated nutrient acquisition from organic matter for topsoil in (Figure 6 b)**

| Year | Biochem_min | treatment |
|------|-------------|-----------|
| 2013 | 6.130665    | ambient   |
| 2014 | 6.848546    | ambient   |

|      |          |          |
|------|----------|----------|
| 2015 | 7.388745 | ambient  |
| 2016 | 6.970970 | ambient  |
| 2017 | 5.131872 | ambient  |
| 2018 | 6.426970 | ambient  |
| 2019 | 8.223400 | ambient  |
| 2013 | 7.512194 | elevated |
| 2014 | 8.752846 | elevated |
| 2015 | 8.357885 | elevated |
| 2016 | 9.052025 | elevated |
| 2017 | 6.350718 | elevated |
| 2018 | 7.988040 | elevated |
| 2019 | 9.441283 | elevated |

**Table S5: Simulated uptake sources (C, N, P) for microbial growth at EucFACE in top soil (50 cm) (Figure 7a)**

| <b>flux</b>         | <b>Flux_class</b> | <b>fraction</b> | <b>CO2 treatment</b> |
|---------------------|-------------------|-----------------|----------------------|
| soluble litter      | organic           | 0.14            | ambient              |
| microbial residue   | organic           | 0.29            | ambient              |
| polymeric litter    | organic           | 0.15            | ambient              |
| microbial recycling | organic           | 0.12            | ambient              |
| exudation blank     | organic           | 0.30            | ambient              |
| soluble litter      | organic           | 0.14            | elevated             |
| microbial residue   | organic           | 0.27            | elevated             |
| polymeric litter    | organic           | 0.14            | elevated             |
| microbial recycling | organic           | 0.12            | elevated             |
| exudation blank     | organic           | 0.34            | elevated             |

30

**Table S6: Simulated uptake sources (C, N, P) for microbial growth at EucFACE in top soil (50 cm) (Figure 7b)**

| <b>flux</b>         | <b>Flux_class</b> | <b>fraction</b> | <b>CO2 treatment</b> |
|---------------------|-------------------|-----------------|----------------------|
| NH4 Uptake          | inorganic         | 0.22            | ambient              |
| NO3 Uptake          | inorganic         | 0.01            | ambient              |
| AsymN fixation      | inorganic         | 0.01            | ambient              |
| soluble litter      | organic           | 0.04            | ambient              |
| microbial residue   | organic           | 0.38            | ambient              |
| polymeric litter    | organic           | 0.02            | ambient              |
| microbial recycling | organic           | 0.32            | ambient              |
| exudation blank     | organic           | 0.01            | ambient              |
| NH4 Uptake          | inorganic         | 0.23            | elevated             |
| NO3 Uptake          | inorganic         | 0.01            | elevated             |
| AsymN fixation      | inorganic         | 0.02            | elevated             |
| soluble litter      | organic           | 0.04            | elevated             |
| microbial residue   | organic           | 0.36            | elevated             |
| polymeric litter    | organic           | 0.01            | elevated             |
| microbial recycling | organic           | 0.32            | elevated             |

|                 |         |      |          |
|-----------------|---------|------|----------|
| exudation blank | organic | 0.02 | elevated |
|-----------------|---------|------|----------|

**Table S7: Simulated uptake sources (C, N, P) for microbial growth at EucFACE in top soil (50 cm) (Figure 7c)**

| <b>flux</b>         | <b>Flux_class</b> | <b>fraction</b> | <b>CO2 treatment</b> |
|---------------------|-------------------|-----------------|----------------------|
| PO4 Uptake          | inorganic         | 0.45            | ambient              |
| soluble litter      | organic           | 0.01            | ambient              |
| microbial residue   | organic           | 0.15            | ambient              |
| polymeric litter    | organic           | 0               | ambient              |
| microbial recycling | organic           | 0.39            | ambient              |
| PO4 Uptake          | inorganic         | 0.46            | elevated             |
| soluble litter      | organic           | 0.01            | elevated             |
| microbial residue   | organic           | 0.14            | elevated             |
| polymeric litter    | organic           | 0               | elevated             |
| microbial recycling | organic           | 0.39            | elevated             |

35

**Table S8: Simulated balance for microbial necromass cycling in top soils (50 cm) (Figure 8)**

| <b>element</b> | <b>Flux_class</b> | <b>Value [g m<sup>-2</sup> yr<sup>-1</sup>]</b> | <b>CO2 treatment</b> |
|----------------|-------------------|-------------------------------------------------|----------------------|
| carbon         | res_in            | 260.                                            | ambient              |
| carbon         | res_out           | -260.                                           | ambient              |
| carbon         | res_in            | 295.                                            | elevated             |
| carbon         | res_out           | -283.                                           | elevated             |
| nitrogen       | res_in            | 41.5                                            | ambient              |
| nitrogen       | res_out           | -41.6                                           | ambient              |
| nitrogen       | res_in            | 47.1                                            | elevated             |
| nitrogen       | res_out           | -45.4                                           | elevated             |
| phosphor       | res_out           | -4.02                                           | ambient              |
| phosphor       | biomin_loss       | -7.55                                           | ambient              |
| phosphor       | res_in            | 10.5                                            | ambient              |
| phosphor       | res_out           | -4.25                                           | elevated             |
| phosphor       | biomin_loss       | -10.8                                           | elevated             |

|          |        |      |          |
|----------|--------|------|----------|
| phosphor | res_in | 11.9 | elevated |
|----------|--------|------|----------|

40

**Table S9: Allocation of additional GPP under eCO<sub>2</sub> (Figure B 4)**

| <b>Simulation</b> | <b>Sink</b> | <b>Fraction of GPP</b> |
|-------------------|-------------|------------------------|
| With RE           | Total_veg_C | 0.195                  |
| With RE           | litter      | 0.0557                 |
| With RE           | SOM         | 0.101                  |
| With RE           | HetResp     | 0.278                  |
| With RE           | AutResp     | 0.370                  |
| Without RE        | Total_veg_C | 0.291                  |
| Without RE        | litter      | 0.0609                 |
| Without RE        | SOM         | 0.0173                 |
| Without RE        | HetResp     | 0.120                  |
| Without RE        | AutResp     | 0.510                  |

**Table S10: Simulated fate of additional sequestered C under eCO<sub>2</sub> (Figure B 5)**

| <b>flux_class</b> | <b>flux</b>    | <b>Percentage of additional GPP</b> |
|-------------------|----------------|-------------------------------------|
| Ra+BP+CEX         | BP             | 49.0                                |
| Ra+BP+CEX         | Ra             | 51.0                                |
| R                 | Rh             | 12.0                                |
| R                 | Ra             | 51.0                                |
| DCpools           | dVeg           | 29.1                                |
| DCpools           | dSOC_deep_soil | 1.88                                |
| DCpools           | dSOC_top_soil  | -0.16                               |
| DCpools           | dlitter        | 6.09                                |

**Table S11: Simulated major mineralization fluxes (Figure B 6)**

| <b>Year</b> | <b>treat<br/>ment</b> | <b>Heterotrophic<br/>respiration<br/>[g C m<sup>-2</sup> yr<sup>-1</sup>]</b> | <b>Root<br/>respiration<br/>[g C m<sup>-2</sup> yr<sup>-1</sup>]</b> | <b>NH<sub>4</sub> Net<br/>Mineralization<br/>[g N m<sup>-2</sup> yr<sup>-1</sup>]</b> | <b>Biochemical<br/>mineralization<br/>[g P m<sup>-2</sup> yr<sup>-1</sup>]</b> | <b>PO<sub>4</sub> Net<br/>Mineralization<br/>[g P m<sup>-2</sup> yr<sup>-1</sup>]</b> |
|-------------|-----------------------|-------------------------------------------------------------------------------|----------------------------------------------------------------------|---------------------------------------------------------------------------------------|--------------------------------------------------------------------------------|---------------------------------------------------------------------------------------|
| 1           | aCO2                  | 643.79                                                                        | 381.95                                                               | 9.13                                                                                  | 6.13                                                                           | 0.08                                                                                  |
| 2           | aCO2                  | 626.97                                                                        | 356.73                                                               | 7.86                                                                                  | 6.84                                                                           | 0.68                                                                                  |
| 3           | aCO2                  | 685.83                                                                        | 375.94                                                               | 7.16                                                                                  | 7.4                                                                            | 0.04                                                                                  |
| 4           | aCO2                  | 694.24                                                                        | 367.54                                                               | 7.27                                                                                  | 6.97                                                                           | -0.04                                                                                 |
| 5           | aCO2                  | 581.33                                                                        | 372.34                                                               | 13.17                                                                                 | 5.14                                                                           | 0.21                                                                                  |
| 6           | aCO2                  | 626.97                                                                        | 324.3                                                                | 8.78                                                                                  | 6.44                                                                           | 0.02                                                                                  |
| 7           | aCO2                  | 721.86                                                                        | 331.5                                                                | 3.88                                                                                  | 8.24                                                                           | 0.2                                                                                   |
| 1           | eCO2                  | 695.44                                                                        | 401.17                                                               | 6.22                                                                                  | 7.53                                                                           | 0.25                                                                                  |
| 2           | eCO2                  | 713.45                                                                        | 392.76                                                               | 5.06                                                                                  | 8.76                                                                           | 0.88                                                                                  |
| 3           | eCO2                  | 760.3                                                                         | 426.39                                                               | 7.42                                                                                  | 8.36                                                                           | -0.14                                                                                 |
| 4           | eCO2                  | 804.74                                                                        | 417.98                                                               | 5.14                                                                                  | 9.04                                                                           | 0.18                                                                                  |
| 5           | eCO2                  | 665.41                                                                        | 427.59                                                               | 13.46                                                                                 | 6.35                                                                           | 0.22                                                                                  |
| 6           | eCO2                  | 726.67                                                                        | 372.34                                                               | 9.96                                                                                  | 7.99                                                                           | 0.37                                                                                  |
| 7           | eCO2                  | 833.56                                                                        | 389.16                                                               | 3.57                                                                                  | 9.45                                                                           | -0.11                                                                                 |

75

**Table S12: Mean annual available PO<sub>4</sub> (Figure B 7)**

| <b>Year</b> | <b>Available PO<sub>4</sub> [g P m<sup>-2</sup>]</b> | <b>treatment</b> |
|-------------|------------------------------------------------------|------------------|
| 1           | 0.15                                                 | aCO2             |
| 2           | 0.18                                                 | aCO2             |
| 3           | 0.22                                                 | aCO2             |
| 4           | 0.15                                                 | aCO2             |
| 5           | 0.26                                                 | aCO2             |
| 6           | 0.13                                                 | aCO2             |
| 7           | 0.18                                                 | aCO2             |
| 1           | 0.19                                                 | eCO2             |
| 2           | 0.23                                                 | eCO2             |
| 3           | 0.24                                                 | eCO2             |
| 4           | 0.16                                                 | eCO2             |
| 5           | 0.34                                                 | eCO2             |
| 6           | 0.17                                                 | eCO2             |
| 7           | 0.19                                                 | eCO2             |

80

**Table S13: Simulated changes in top soil pools (Figure B 10)**

| <b>DOM</b><br>[g m <sup>-2</sup> yr <sup>-1</sup> ] | <b>Mic</b><br>[g m <sup>-2</sup> yr <sup>-1</sup> ] | <b>Res</b><br>[g m <sup>-2</sup> yr <sup>-1</sup> ] | <b>aDOM</b><br>[g m <sup>-2</sup> yr <sup>-1</sup> ] | <b>aRes</b><br>[g m <sup>-2</sup> yr <sup>-1</sup> ] | <b>treatment</b> | <b>element</b> |
|-----------------------------------------------------|-----------------------------------------------------|-----------------------------------------------------|------------------------------------------------------|------------------------------------------------------|------------------|----------------|
| -0.46                                               | 2.98                                                | 0.08                                                | 0.36                                                 | -1.32                                                | aCO2             | carbon         |
| -0.03                                               | 6.02                                                | 10.4                                                | 4.11                                                 | -8.11                                                | eCO2             | carbon         |
| -0.05                                               | 0.69                                                | -0.05                                               | 0.04                                                 | -0.21                                                | aCO2             | nitrogen       |
| -0.01                                               | 1.41                                                | 1.66                                                | 0.31                                                 | -1.3                                                 | eCO2             | nitrogen       |
| -0.01                                               | 0.17                                                | -0.17                                               | 0.01                                                 | -0.02                                                | aCO2             | phosphorus     |
| 0                                                   | 0.34                                                | -0.19                                               | 0.04                                                 | -0.36                                                | eCO2             | phosphorus     |

Table S14: Simulated changes in soil pools (Figure B 11)

| <b>DOM</b><br>[g m <sup>-2</sup> yr <sup>-1</sup> ] | <b>Mic</b><br>[g m <sup>-2</sup> yr <sup>-1</sup> ] | <b>Res</b><br>[g m <sup>-2</sup> yr <sup>-1</sup> ] | <b>aDOM</b><br>[g m <sup>-2</sup> yr <sup>-1</sup> ] | <b>aRes</b><br>[g m <sup>-2</sup> yr <sup>-1</sup> ] | <b>treatment</b> | <b>element</b> |
|-----------------------------------------------------|-----------------------------------------------------|-----------------------------------------------------|------------------------------------------------------|------------------------------------------------------|------------------|----------------|
| 22.26                                               | 3.25                                                | 8.50                                                | 29.41                                                | -3.98                                                | aCO2             | carbon         |
| 30.01                                               | 6.65                                                | 21.33                                               | 43.88                                                | -5.85                                                | eCO2             | carbon         |
| 0.22                                                | 0.75                                                | 1.33                                                | 0.44                                                 | -0.76                                                | aCO2             | nitrogen       |
| 0.30                                                | 1.54                                                | 3.41                                                | 0.87                                                 | -1.05                                                | eCO2             | nitrogen       |
| 0.00                                                | 0.18                                                | -0.13                                               | 0.03                                                 | -0.05                                                | aCO2             | phosphorus     |
| 0.01                                                | 0.38                                                | -0.09                                               | 0.08                                                 | -0.37                                                | eCO2             | phosphorus     |
